# Supplementary material for: Highly selective production of linear 1-heptadecene from stearic acid over a partially reduced MoOx catalyst
Source: Royal Society of Chemistry journal article supplement (doi:10.1039/d0cc01307b), 2020-01-01
Supplement: d0cc01307b1.pdf [file d0cc01307b1.pdf]

## Supplementary information

### Highly Selective Production of Linear 1-Heptadecene from Stearic Acid over a Partially Reduced MoO<sub>x</sub> Catalyst

Zihao Zhang<sup>abc</sup>, Yafei Li<sup>a</sup>, Francis Okejiri<sup>d</sup>, Miaomiao Liu<sup>d</sup>, Hao Chen<sup>a</sup>, Jixing Liu<sup>d</sup>, Kequan Chen<sup>e</sup>,  
Xiuyang Lu<sup>a</sup>, Pingkai Ouyang<sup>a,e</sup>, Jie Fu<sup>a,b\*</sup>

<sup>a</sup> Key Laboratory of Biomass Chemical Engineering of Ministry of Education, College of Chemical and Biological Engineering, Zhejiang University, Hangzhou 310027, China

<sup>b</sup> Institute of Zhejiang University - Quzhou, 78 Jiuhua Boulevard North, Quzhou 324000, China

<sup>c</sup> Institute for Integrated Catalysis, Pacific Northwest National Laboratory, 902 Battelle Blvd., Richland, Washington 99352, USA

<sup>d</sup> Department of Chemistry, The University of Tennessee, Knoxville, TN 37996, USA

<sup>e</sup> State Key Laboratory of Materials-Oriented Chemical Engineering, College of Biotechnology and Pharmaceutical Engineering, Nanjing Tech University, Nanjing 211816, China

\* Corresponding author

Jie Fu, Tel.: +86 571 87951065, E-mail address: [jiefu@zju.edu.cn](mailto:jiefu@zju.edu.cn)

## Experimental Section

### Materials

Acetone (99.5%) and Acetic anhydride ( $\text{Ac}_2\text{O}$ , 98%) were purchased from Sinopharm Chemical Reagent Co., Ltd. Bis(2-diphenylphosphinophenyl)ether (DPEphos) was obtained from Sigma-Aldrich, USA. Ammonium molybdate (99.9%) was purchased from the Aladdin Industrial Corporation, China. Stearic acid was purchased from Mecklin Co., China. 1-heptadecene (99.5%) was acquired from TCI (Shanghai) Development Co., Ltd. All reagents were directly used without purification.

### Synthesis of $\text{MoO}_3$ and $\text{MoO}_x\text{-T}$

A certain amount of ammonium molybdate was heated in a muffle furnace at 500 °C for 4 h to obtain  $\text{MoO}_3$  as the catalyst precursor. The as-synthesized  $\text{MoO}_3$  was then reduced in an  $\text{H}_2$  environment at different temperatures (150, 300, 450, 600, 700 °C) for 2 h to obtain  $\text{MoO}_x\text{-T}$  catalysts, where T represents the reduction temperature.

### Experimental procedures and analytical method

In a typical experimental process, a certain amount of stearic acid and  $\text{MoO}_x$  catalysts together with 30 mg DPEphos and 30  $\mu\text{L}$   $\text{Ac}_2\text{O}$  were in turns loaded into an 8 mL batch reactor and sealed properly. The sealed reactor was purged three times with nitrogen gas to remove unwanted air molecules and then filled with  $\text{N}_2$  at atmospheric pressure. Thereafter, the reactor was heated at the required temperature for a certain amount of time. At the end of the reaction time, the products were recovered from the reactor after quenching in a cold-water bath and subsequently washed in acetone in readiness for GC analysis. The liquid products were analyzed on a gas chromatograph (Agilent 7890B) equipped with an

Agilent CP-FFAP CB capillary column and a flame ionization detector (FID). The gaseous products were analyzed on SHIMADZU GC-2018 gas chromatograph equipped with an Agilent PLOT 5A molecular sieve filled column and thermal conductivity detector (TCD). The identification of the products was done by matching the retention times of the unknown compounds to those of reference standards. The quantitative analysis was performed using external calibration curves for each compound. The conversion of stearic acid and yields of products were calculated using the equations below. The selectivity to 1-heptadecene is determined by dividing moles of achieved 1-heptadecene by moles of generated heptadecene. The reported data are average values of three independent experiments. The calculated conversion and yields of products were all based on the equivalent amount of carbon. The error bars represent the standard deviation of three replicate experiments.

$$\text{Conversion(\%)} = 1 - \frac{\text{moles of remaining reactant}}{\text{moles of reactant added}} \times 100\%$$

$$\text{Yield(\%)} = \frac{\text{moles of product}}{\text{moles of reactant added}} \times 100\%$$

## Characterizations

The crystal structure of our MoO<sub>x</sub> catalysts was studied by the PXRD technique recorded on PANalytical Empyrean 200895 diffractometer with a Cu K $\alpha$  source operated at 40 kV and 40 mA. The catalysts scanned over a 2 $\theta$  range of 10-90°. The temperature-programmed reduction (H<sub>2</sub>-TPR) analysis was performed on the FineSorb-3010 instrument equipped with a TCD (Zhejiang Finetec Instruments Co., Ltd.). For the H<sub>2</sub>-TPR measurement, the samples were first pretreated at 120 °C for 1 h under Ar flow (rate = 15 mL/min) and then cooled to 60 °C. Following this, the reactor was heated to 800 °C in 10% H<sub>2</sub>/Ar flow (30 mL min<sup>-1</sup>) at a heating rate of 10 °C min<sup>-1</sup>. The H<sub>2</sub>-TPR profiles were acquired after maintaining the temperature at 800 °C for 30 mins. The transmission electron microscopy (TEM) and high-resolution TEM (HRTEM) images were both acquired on the JEM-2100 microscopy instrument. X-ray

photoelectron spectroscopy (XPS) analysis was performed on an ESCALAB 250 spectrometer.

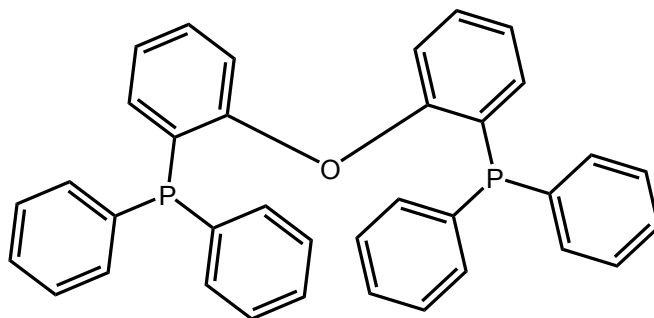

**Figure S1.** The molecular structure of DPEphos.

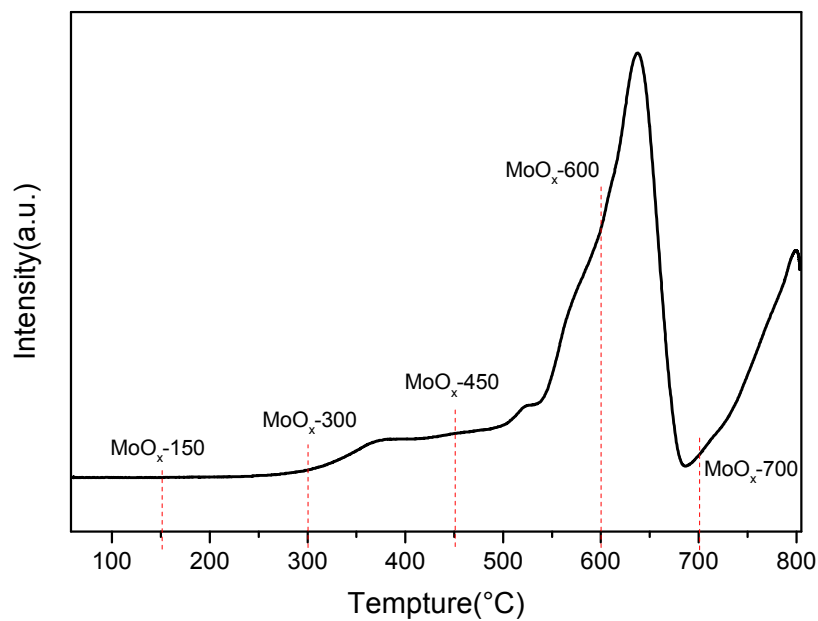

**Figure S2.** H<sub>2</sub>-TPR profile of MoO<sub>3</sub> sample obtained from the calcination of ammonium molybdate at 500 °C.

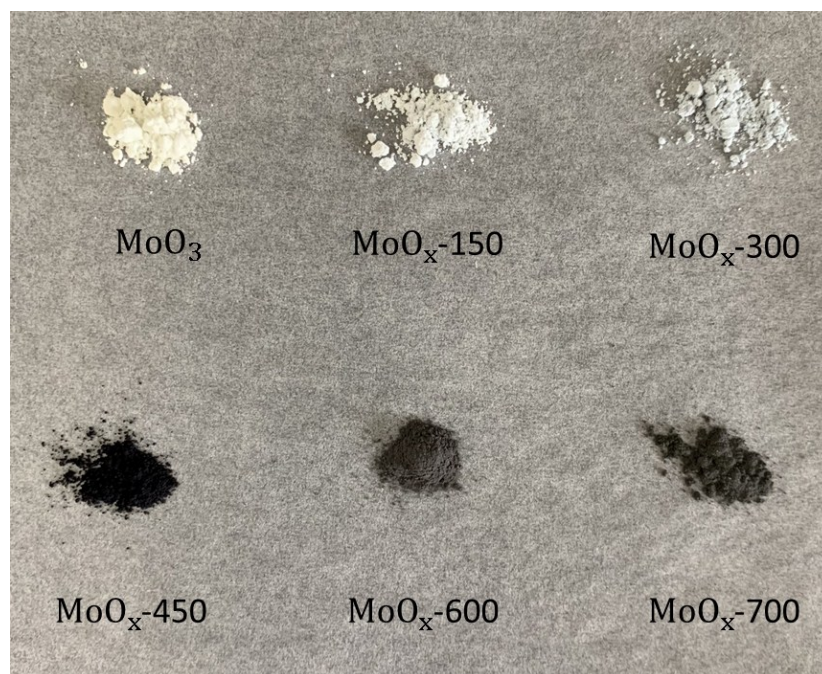

**Figure S3.** The appearance of MoO<sub>3</sub>, MoO<sub>x</sub>-150, MoO<sub>x</sub>-300, MoO<sub>x</sub>-450, MoO<sub>x</sub>-600 and MoO<sub>x</sub>-700 samples.

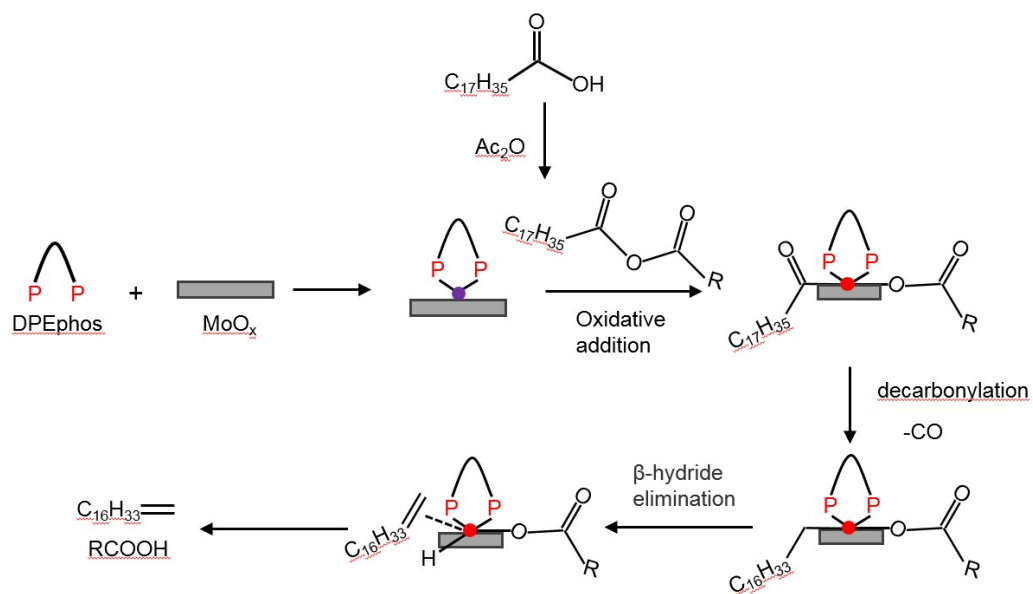

**Figure S4.** The reaction steps of decarbonylative dehydration of stearic acid in the DPEphos-AcO<sub>2</sub> system.

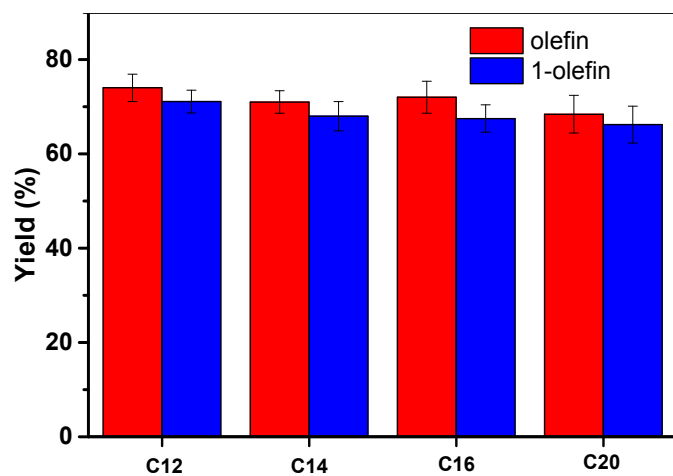

**Figure S5.** The yield of olefin and 1-olefin from conversion of lauric acid, myristic acid, palmitic acid and eicosanoic acid over MoO<sub>x</sub>-600 catalyst; Reaction conditions: Reactant = 50 mg, catalyst = 30 mg, T = 190 °C, t = 16 h, Ac<sub>2</sub>O = 30 μL, DPEphos = 30 mg.



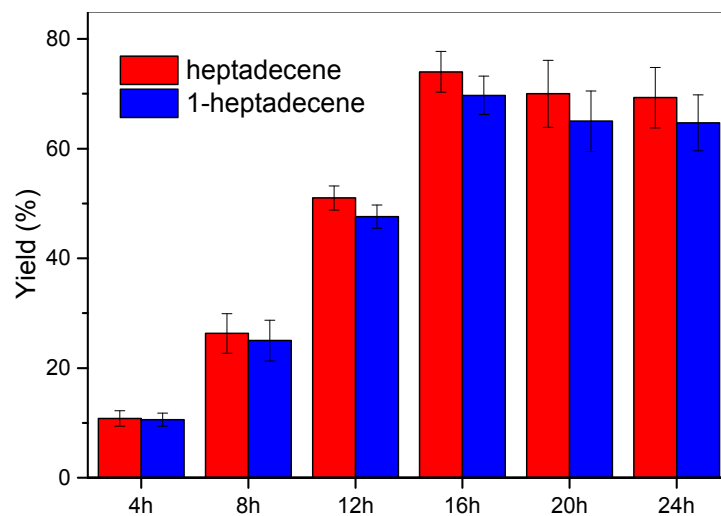

**Figure S6.** The yield of heptadecene and 1-heptadecene from conversion of stearic acid over  $\text{MoO}_x\text{-600}$  catalyst with different reaction time; Reaction conditions: Stearic acid = 50 mg, catalyst = 30 mg,  $T = 190\text{ }^\circ\text{C}$ ,  $t = 4\sim 24\text{ h}$ ,  $\text{Ac}_2\text{O} = 30\text{ }\mu\text{L}$ , DPEphos = 30 mg.

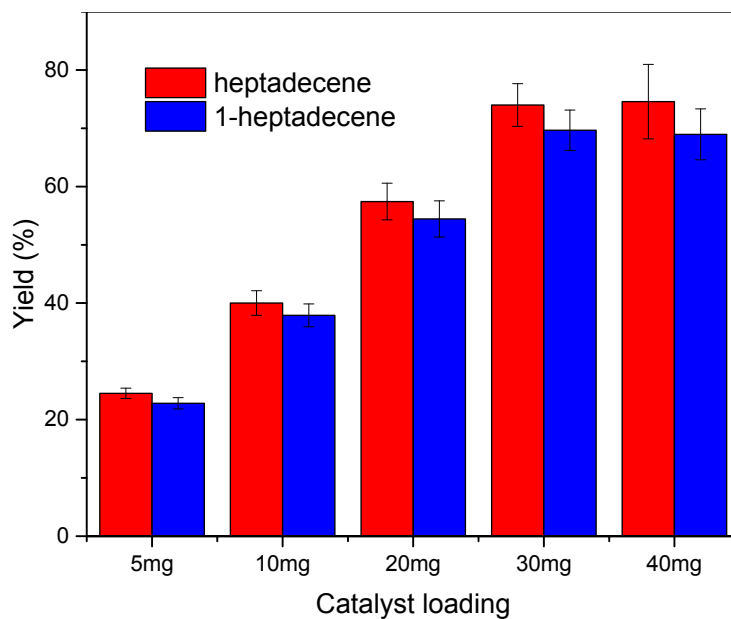

**Figure S7.** The yield of heptadecene and 1-heptadecene from conversion of stearic acid over MoO<sub>x</sub>-600 catalyst with different catalyst loading; Reaction conditions: Stearic acid = 50 mg, catalyst = 5~40 mg, T= 190 °C, t = 16 h, Ac<sub>2</sub>O = 30 μL, DPEphos = 30 mg.

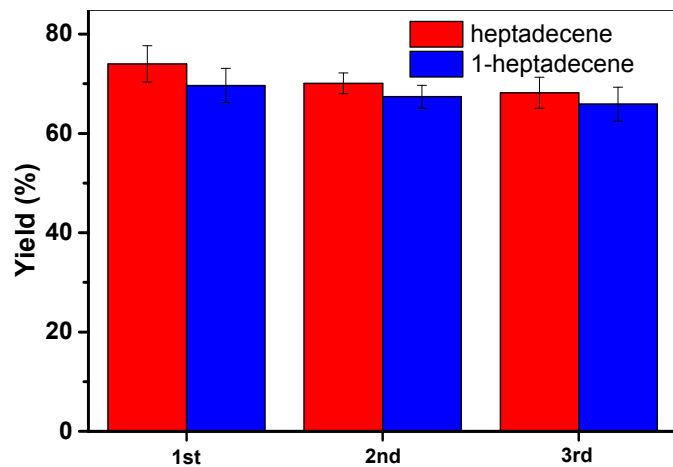

**Figure S8.** The yield of heptadecene and 1-heptadecene from conversion of stearic acid over fresh (1st), used once (2nd) and used twice (3rd) MoO<sub>x</sub>-600 catalysts; Reaction conditions: Stearic acid = 50 mg, catalyst = 30 mg, T= 190 °C, t = 16 h, Ac<sub>2</sub>O = 30 μL, DPEphos = 30 mg.

**Table S1.** XPS binding energy values for Mo 3d<sub>5/2</sub> (3d<sub>3/2</sub>) of MoO<sub>x</sub>-450, MoO<sub>x</sub>-600, and MoO<sub>x</sub>-700 samples

| Samples               | Mo <sup>0</sup> | Mo <sup>4+</sup> | Mo <sup>5+</sup> | Mo <sup>6+</sup> |
|-----------------------|-----------------|------------------|------------------|------------------|
| MoO <sub>x</sub> -450 | ~               | 228.8 (232.8)    | 231.0 (234.2)    | 232.2 (235.5)    |
| MoO <sub>x</sub> -600 | 227.6 (230.8)   | 228.8 (232.8)    | 231.2 (234.4)    | 232.1 (235.5)    |
| MoO <sub>x</sub> -700 | 227.6 (230.7)   | 228.6 (232.7)    | 231.3 (234.5)    | ~                |
